# Supplementary material for: Cellular reagents for diagnostics and synthetic biology
Source: PubMed Central journal article supplement (PMC6093680; doi:10.1371/journal.pone.0201681), 2018-08-15
Supplement: pone.0201681.s001.pdf [file pone.0201681.s001.pdf]

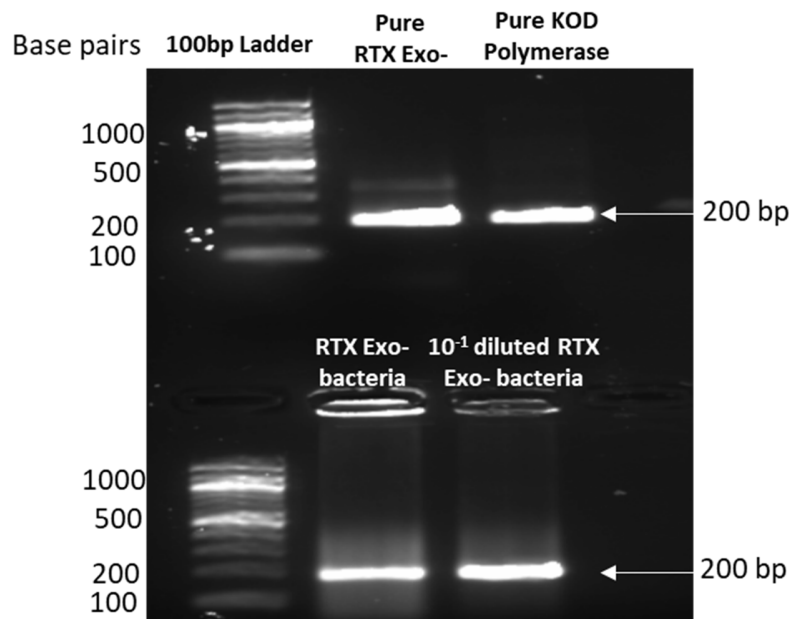

**S1 Fig. Endpoint PCR analysis using fresh culture of RTX Exo- polymerase expressing cellular reagents.** Control PCR amplifications performed using pure RTX Exo- polymerase and KOD polymerase are shown in the top panel. Bottom panel depicts PCR products generated using fresh (non-lyophilized) cellular reagents.
