# Supplementary material for: Cellular reagents for diagnostics and synthetic biology
Source: PubMed Central journal article supplement (PMC6093680; doi:10.1371/journal.pone.0201681), 2018-08-15
Supplement: pone.0201681.s004.pdf [file pone.0201681.s004.pdf]

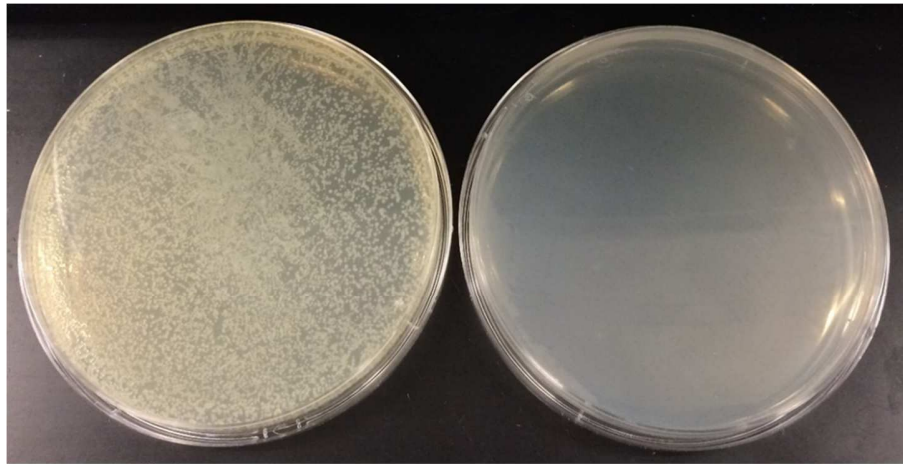

Cellular reagents  
lyophilized in 1X PBS  
containing 0.1M trehalose

Cellular reagents  
lyophilized in 1X PBS

**S4 Fig. Assessment of bacterial viability in cellular reagents.** BL21 *E. coli* expressing Taq DNA polymerase were lyophilized in either 1X PBS or in 1X PBS supplemented with 0.1M trehalose. After 3 days of storage at ambient temperature, the lyophilized cellular reagents were rehydrated in 30  $\mu$ L water and half of the material was spread plated on Luria Bertani agar plates. Images of these plates were taken after overnight incubation at 37  $^{\circ}$ C. Only bacteria that were lyophilized in the presence of trehalose retained viability. Cellular reagents lyophilized without trehalose do not remain viable.
