# Supplementary material for: Cellular reagents for diagnostics and synthetic biology
Source: PubMed Central journal article supplement (PMC6093680; doi:10.1371/journal.pone.0201681), 2018-08-15
Supplement: pone.0201681.s010.pdf [file pone.0201681.s010.pdf]

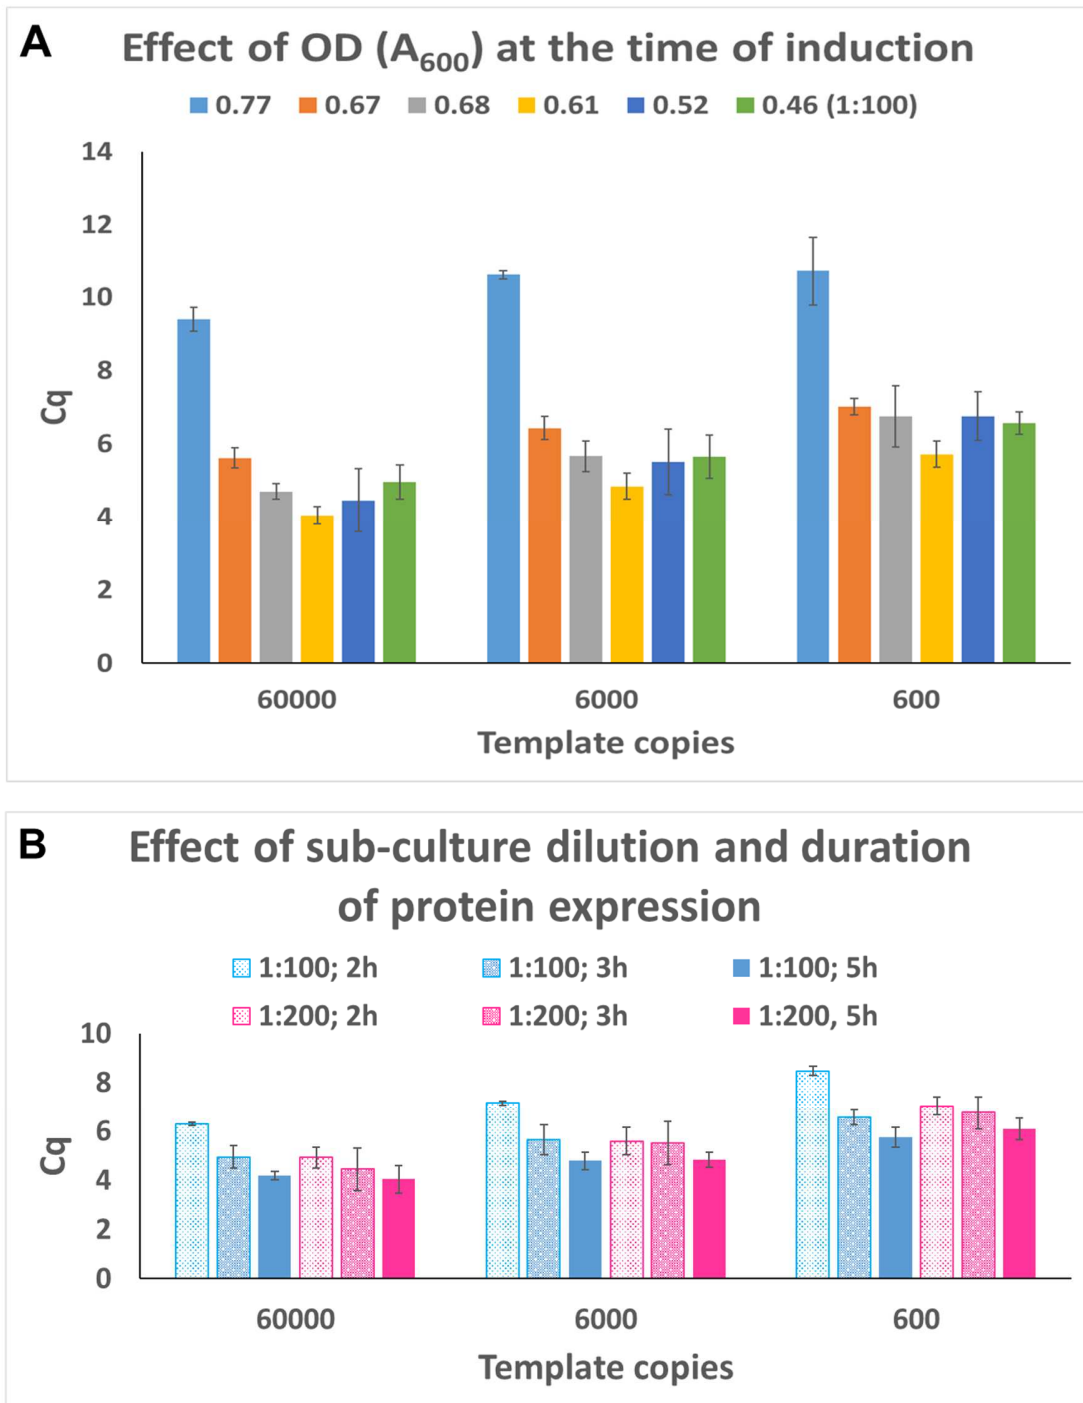

**S10 Fig. Effect of culture conditions on performance of cellular reagents.** Amplification efficiencies of lyophilized cellular reagents expressing Bst-LF DNA polymerase were tested in LAMP-OSD assays using indicated template copies. LAMP amplicon accumulation was measured in real-time using fluorogenic OSD probes. Cq values (time-to-signal) at different template copies determined using the “Abs quant” analysis protocol in the LightCycler 96 software are depicted.
