# Supplementary material for: Cellular reagents for diagnostics and synthetic biology
Source: PubMed Central journal article supplement (PMC6093680; doi:10.1371/journal.pone.0201681), 2018-08-15
Supplement: pone.0201681.s012.pdf [file pone.0201681.s012.pdf]

**S1 Table. Oligonucleotide and template sequences used in the study.**

| Name                                  | Sequence                                                                                                                                                                                                                                                                                                                                                                                                                                                                                                                                            | Use                                                   |
|---------------------------------------|-----------------------------------------------------------------------------------------------------------------------------------------------------------------------------------------------------------------------------------------------------------------------------------------------------------------------------------------------------------------------------------------------------------------------------------------------------------------------------------------------------------------------------------------------------|-------------------------------------------------------|
| CT-F                                  | TAGTGGCGGAAGGGTTAG                                                                                                                                                                                                                                                                                                                                                                                                                                                                                                                                  |                                                       |
| CT-R                                  | CGTCATAGCCTTGGTAGG                                                                                                                                                                                                                                                                                                                                                                                                                                                                                                                                  |                                                       |
| <i>Chlamydia trachomatis</i> template | CGCCAAGCTTGGTACCGAGCTCGGATCCACTAGTAACGGCCGCCAGTGTGCTGGAA<br>TTCTAATACGACTCACTATAGGGCAATTGTTTAGTGGCGGAAGGGTTAGTAATGCATA<br>GATAATTTGTCCTTAACCTTGGGAATAACGGTTGGAAACGGCCGCTAATACCGAATGT<br>GGCGATATTTGGGCATCCGAGTAACGTTAAAGAAGGGGATCTTAGGACCTTTTCGGTT<br>AAGGGAGAGTCTATGTGATATCAGCTAGTTGGTGGGGTAAAGGCCTACCAAGGCTAT<br>GACGTCTAGGCGGATTGAGAGATTGGCCGCCAACACTGGGACTGAGACACTGCCCA<br>GACTCCTACGGGAGGCTGCAGTCGAGAATCTTTGCAATGGACGGAAGTCTGACGA<br>AGCGACGCCGCGTGTGTGATGAAGGCTCTAGGGTTGTAAGGAATTCTGCAGATAT<br>CCATCACACTGGCGGCCGCTCGAGCATGCATCTAGAGGGCCCAATT | <i>Chlamydia trachomatis</i> qPCR                     |
| Zika-255-F                            | GGTAGATCCATTGTGGTCCCTTGCC                                                                                                                                                                                                                                                                                                                                                                                                                                                                                                                           |                                                       |
| Zika-256-R                            | CCACACCATGAGCATGTCCTCAGTAGTC                                                                                                                                                                                                                                                                                                                                                                                                                                                                                                                        |                                                       |
| Zika virus template                   | CTAGTAACGGCCGCCAGTGTGCTGGAATTCGGTAGATCCATTGTGGTCCCTTGCCG<br>CCACCAAGATGAATTGATTGGCCGAGCCCGTGTATCACCAGGGGCAGGATGGAGCA<br>TTCGGGAGACTGCCTGTCTAGCAAAATCATATGCACAGATGTGGCAGCTTCTTTACT<br>TCCACAGAAGAGACCTTCGACTGATGGCCAATGCTATTTGTTGCGCTGTGCCAGTTG<br>ACTGGGTACCAACCGGGAGAACCACCTGGTCAATCCACGGAAAGGGAGAATGGATG<br>ACTACTGAGGACATGCTCATGGTGTGGAATAGAGTGTGGATTGAGGAGGAATTCTGC<br>AGATATCCATCACACTGGCGGCCGCTCGAGC                                                                                                                                          | Zika Evagreen q(RT)PCR                                |
| gapdLAMP.F3                           | GCCACCCAGAAGACTGTG                                                                                                                                                                                                                                                                                                                                                                                                                                                                                                                                  | gapd LAMP-OSD                                         |
| gapdLAMP.B3                           | TGGCAGGTTTTCTAGACGG                                                                                                                                                                                                                                                                                                                                                                                                                                                                                                                                 |                                                       |
| gapdLAMP.FIP                          | CGCCAGTAGAGGCAGGGATGAGGGAAACTGTGGCCTGAT                                                                                                                                                                                                                                                                                                                                                                                                                                                                                                             |                                                       |
| gapdLAMP.BIP                          | GGTCATCCCTGAGCTGAACGGTCAGGTCCACCACTGACAC                                                                                                                                                                                                                                                                                                                                                                                                                                                                                                            |                                                       |
| gapdLAMP.LR                           | TGTTCTGGAGAGCCCCGCGGCC                                                                                                                                                                                                                                                                                                                                                                                                                                                                                                                              |                                                       |
| gapdOSD.F                             | /56-FAM/CTCACTGGCATGGCCTTCCGTGTCCCCACTGCCAAC/3InvdT/                                                                                                                                                                                                                                                                                                                                                                                                                                                                                                |                                                       |
| gapdOSD.Q                             | GGACACGGAAGGCCATGCCAGTGAG/3IABkFQ/                                                                                                                                                                                                                                                                                                                                                                                                                                                                                                                  |                                                       |
| gapd template                         | CTAGTAACGGCCGCCAGTGTGCTGGAATTCACAGTCCATGCCATCACTGCCACC<br>CAGAAGACTGTGGATGGCCCCTCCGGGAAACTGTGGCGTGATGGCCGCGGGGCTC<br>TCCAGAACATCATCCCTGCCTCTACTGGCGTGCCAAGGCTGTGGGCAAGGTCATC<br>CCTGAGCTGAACGGGAAGCTCACTGGCATGGCCTTCCGTGTCCCCACTGCCAACGT<br>GTCAGTGGTGGACCTGACCTGCCGTCTAGAAAACCTGCCAAATATGATGACATCAA<br>GAAGGTGGTGAAGCAGGCGTCGGAGGGCCCCCTCAAGGGCATCCTGGGCTACACT<br>GAGCACCAGGTGGTCTCCTCTGACTTCAACAGCGACACCCACTCCTCCACCTTTGAC<br>GCTGGGGCTGGCATTGCCCTCAACGACCCTTTGTCAAGCTCATTTCTGGAATTCT<br>GCAGATATCCATCACACTGGCGGCCGCTCGAGC                        |                                                       |
| Zika 4481_F                           | CTGTGGCATGAACCCAATAG                                                                                                                                                                                                                                                                                                                                                                                                                                                                                                                                | Zika TaqMan q(RT)PCR                                  |
| Zika 4552c                            | ATCCCATAGAGCACCCTCC                                                                                                                                                                                                                                                                                                                                                                                                                                                                                                                                 |                                                       |
| Zika 4507c-FAM                        | /56-FAM/CCACGCTCCAGCTGCAAAGG/3IABkFQ/                                                                                                                                                                                                                                                                                                                                                                                                                                                                                                               | Zika TaqMan q(RT)PCR                                  |
| Zika TaqMan template                  | GGGAC CATCTGTGGCATGAACCCAA TAGCCATACC CTTTGCAGCT GGAGCGTGGT<br>ACGTGTATGT GAAGACTGGAAAAAGGAGTG GTGCTCTATG GGATGTGCCCT                                                                                                                                                                                                                                                                                                                                                                                                                               |                                                       |
| SB.pATetO.R                           | GCG CCC TTC GAT GTG ATG GTG ATG GTG ATG CGA TCC TCT G                                                                                                                                                                                                                                                                                                                                                                                                                                                                                               | Cellular PCR primers for pATetO 6XHis                 |
| SB.pATetO.F                           | TGATAATTGCCTCTGCCAAAATTCTGTCTCAAGCGTTTTAGTTCG                                                                                                                                                                                                                                                                                                                                                                                                                                                                                                       | Cellular PCR primers for kan' insert for pATetO 6XHis |
| SB.Kan.ptet. F                        | GATCGCATCACCATCACCATCACATCGAAGGGCGC<br>GCTGAAAGCCAATTCTGATTAGAAAACTC                                                                                                                                                                                                                                                                                                                                                                                                                                                                                | Cellular PCR primers for kan' insert for pATetO 6XHis |
| SB.Kan.ptet.R                         | GAGGACAGAATTTTGGCAGAGGCAATTATCA GATCCTTTGATCTCACGTTGTGTCTC                                                                                                                                                                                                                                                                                                                                                                                                                                                                                          | Cellular PCR primers for pUC19 fragments 1 and 2      |
| SB.puc19FL.F                          | GAT CCC CGG GTA CCG AGC TCG AAT TCA CTG G                                                                                                                                                                                                                                                                                                                                                                                                                                                                                                           | Cellular PCR primers for pUC19 fragments 1 and 2      |
| SB.puc19.FL.R                         | CTC TAG AGT CGA CCT GCA GGC ATG CAA GCT TG                                                                                                                                                                                                                                                                                                                                                                                                                                                                                                          |                                                       |
| SB. puc19sm.R                         | GAC AGT TAC CAA TGC TTA ATC AGT GAG GCA CC                                                                                                                                                                                                                                                                                                                                                                                                                                                                                                          |                                                       |
| SB.puc19sm.F                          | GGTGCCTCACTGATTAAGCATTGGTAACTGTC                                                                                                                                                                                                                                                                                                                                                                                                                                                                                                                    | Cellular PCR primers for kan' insert for pUC19        |
| SB.Kan.puc19.F                        | CAAGCTTGCATGCCTGCAGGTCGACTCTAGAGGCTGAAAGCCAATTCTGATTAGAAA<br>AACTC                                                                                                                                                                                                                                                                                                                                                                                                                                                                                  |                                                       |
| SB.Kan.puc19.R                        | CCAGTGAATTGAGCTCGGTACCCGGGGATC<br>GATCCTTTGATCTCACGTTGTGTCTC                                                                                                                                                                                                                                                                                                                                                                                                                                                                                        | Overlap extension assay                               |
| OE.FWD                                | TAATACGACTCACTATAGGGTGGTTTCTGGGGTGACCGGGTTGATTCTCAGCCCTTC<br>GCA                                                                                                                                                                                                                                                                                                                                                                                                                                                                                    | Overlap extension assay                               |
| OE.REV                                | AGGGGTTGGTTGGATGAATATAGGGGATTGCGAAGGGCTGAGAATCAACCCGGTCA<br>CCCC                                                                                                                                                                                                                                                                                                                                                                                                                                                                                    |                                                       |

|                         |                                                                                                                                                                                                                                                                                                                                                              |                                       |
|-------------------------|--------------------------------------------------------------------------------------------------------------------------------------------------------------------------------------------------------------------------------------------------------------------------------------------------------------------------------------------------------------|---------------------------------------|
| pCR2.1.FluB<br>template | CTAGTAACGGCCGCCAGTGTGCTGGAATTCTAATACGACTCACTATAGGGATGTGCG<br>TGTTTGGAGACACAATTGCCTACTTGCTTTCATTAACAGAAGATGGAGAAGGCAAAG<br>CAGAACTAGCAGAAAAGTTACACTGTTGGTTTGGTGGGAAAGAATTTGACCTAGACT<br>CAGCCTTGAATGGATAAAAAACAAAAGATGCTTAACTGATATACAAAAGCACTAAT<br>TGGTGCCTCTATATGCTTTTTAAAACCCAAAGACCAGGAAAGAAAAAGAAGATTCATC<br>ACAGAATTCTGCAGATATCCATCACACTGGCGGCCGCTCGAGC | Taq DNA<br>polymerase<br>endpoint PCR |
| pCR.FWD                 | CTAGTAACGGCCGCCAGTGTGCTGGAATTC                                                                                                                                                                                                                                                                                                                               |                                       |
| pCR.REV                 | CCGCCAGTGTGATGGATATCTGCAGAATTC                                                                                                                                                                                                                                                                                                                               |                                       |
