# Supplementary material for: Cellular reagents for diagnostics and synthetic biology
Source: PubMed Central journal article supplement (PMC6093680; doi:10.1371/journal.pone.0201681), 2018-08-15
Supplement: pone.0201681.s013.pdf [file pone.0201681.s013.pdf]

**S2 Table.** Cellular reagent Gibson assembly with or without heat treatment of cellular reagents.

| <b>Gibson assembly type</b>                                                      | <b>Number of colonies</b> |
|----------------------------------------------------------------------------------|---------------------------|
| <b>Gel purified pCR2.1 linearized vector + <i>Aedes albopictus</i> S7 gBlock</b> |                           |
| Cellular reagent Gibson with heat-treated Taq DNA polymerase and Taq DNA Ligase  | 111 <sup>a</sup>          |
| Cellular reagent Gibson with no heat treatment of cellular reagents              | 12                        |
| Gibson with pure enzymes (positive control)                                      | 183                       |
| Assembly with no enzymes (negative control)                                      | 1                         |
| <b>Gel purified pCR2.1 linearized vector + <i>E. coli</i> <i>yaiO</i> gBlock</b> |                           |
| Cellular reagent Gibson with heat-treated Taq DNA polymerase and Taq DNA Ligase  | 173                       |
| Gibson with pure enzymes (positive control)                                      | 360                       |
| Assembly with no enzymes (negative control)                                      | 1                         |

<sup>a</sup>All tested positive control clones had the correct sequence. 50% of the cellular reagent Gibson assembled plasmids had the correct sequence. Remaining recovered colonies contained re-circularized vector.
